# Supplementary material for: Efficacy and safety of artesunate–amodiaquine and artemether–lumefantrine and prevalence of molecular markers associated with resistance, Guinea: an open-label two-arm randomised controlled trial
Source: Springer Nature journal article supplement (doi:10.1186/s12936-020-03290-w), 2020-06-24
Supplement: MOESM1 [file 18116278]

**Additional file 1:** Observed fragment lengths of neutral microsatellite loci from paired Day 0 (D0) and Day of Failure (DOF) samples from therapeutic efficacy studies in Guinea, 2016.

| Chromosome<br>Tandem Repeats<br>Marker Name | 6       |         |         |         | 6     |       | 106    |        | 4       |         |         | 2     |       |       | 3     |       | 12      |         |         | Probability of<br>Recrudescence | Final<br>Classification |
|---------------------------------------------|---------|---------|---------|---------|-------|-------|--------|--------|---------|---------|---------|-------|-------|-------|-------|-------|---------|---------|---------|---------------------------------|-------------------------|
|                                             | TAA     |         |         |         | ATT   |       | TAA    |        | ATT     |         |         | AT    |       |       | TA    |       | TAA     |         |         |                                 |                         |
|                                             | TA109   |         |         |         | TA1   |       | 2490   |        | POLYA   |         |         | 313   |       |       | 383   |       | PFPK2   |         |         |                                 |                         |
| Sample ID                                   | TA109_1 | TA109_2 | TA109_3 | TA109_4 | TA1_1 | TA1_2 | 2490_1 | 2490_2 | POLYA_1 | POLYA_2 | POLYA_3 | 313_1 | 313_2 | 313_3 | 383_1 | 383_2 | PFPK2_1 | PFPK2_2 | PFPK2_3 |                                 |                         |
| 01-017_D0                                   | 164     | 175     |         |         | 170   |       | 89     |        | 151     |         |         | 255   |       |       | 271   |       | 156     |         |         | 0,02                            | Reinfection             |
| 01-017_DOF                                  | 164     | 175     |         |         | 168   |       | 82     |        | 180     |         |         | 146   | 236   |       | 137   |       | 168     |         |         |                                 |                         |
| 01-020_D0                                   | 149     | 160     |         |         | 159   |       | x      |        | 142     | 154     |         | x     |       |       | 124   |       | 169     |         |         | 0,01                            | Reinfection             |
| 01-020_DOF                                  | 179     | 160     |         |         | 169   |       | 82     |        | 165     |         |         | 245   |       |       | 144   |       | 174     |         |         |                                 |                         |
| 01-095_D0                                   | 160     | 163     | 197     |         | 169   | 202   | 78     | 82     | 152     | 164     |         | 239   |       |       | 126   | 145   | 177     | 174     |         | 0,01                            | Reinfection             |
| 01-095_DOF                                  | 151     | 160     |         |         | 171   |       | 82     |        | 135     |         |         | 244   |       |       | 141   |       | 172     | 173     | 180     |                                 |                         |
| 01-096_D0                                   | 160     | 173     |         |         | 166   |       | 78     | 82     | 142     | 155     | 168     | 230   | 243   | 245   | 124   |       | 161     | 159     |         | 0,03                            | Reinfection             |
| 01-096_DOF                                  | 160     | 174     | 188     |         | 153   |       | 82     |        | 144     |         |         | 203   | 228   |       | 143   |       | 166     |         |         |                                 |                         |
| 01-108_D0                                   | 179     | 197     |         |         | 178   |       | 81     |        | 180     |         |         | 226   |       |       | 123   |       | 161     |         |         | 0,00                            | Reinfection             |
| 01-108_DOF                                  | 149     | 160     |         |         | 170   |       | 81     |        | 151     |         |         | 257   |       |       | 141   |       | 159     |         |         |                                 |                         |
| 01-113_D0                                   | 163     | 176     |         |         | 175   | 187   | 82     | 88     | 168     | 177     |         | 222   | 245   |       | 128   | 145   | 161     |         |         | 0,00                            | Reinfection             |
| 01-113_DOF                                  | 175     |         |         |         | 160   |       | 18     | 82     | 157     | 177     |         | 140   | 226   |       | 125   | 152   | 162     | 180     |         |                                 |                         |
| 01-120_D0                                   | 163     | 176     | 199     |         | 160   |       | 82     |        | 131     |         |         | 243   |       |       | 124   |       | 159     |         |         | 0,02                            | Reinfection             |
| 01-120_DOF                                  | 164     | 175     |         |         | 166   | 175   | 82     |        | 151     | 162     |         | 234   |       |       | 124   |       | 161     |         |         |                                 |                         |
| 01-123_D0                                   | 165     | 175     |         |         | 175   | 162   | 82     | 88     | 167     | 177     |         | 245   |       |       | 128   |       | 162     | 165     |         | 0,03                            | Reinfection             |
| 01-123_DOF                                  | 165     | 175     |         |         | 160   |       | 81     |        | 157     | 176     |         | 225   |       |       | 151   |       | 180     |         |         |                                 |                         |
| 01-124_D0                                   | 164     | 170     |         |         | 167   |       | 81     | 88     | 154     |         |         | 215   | 251   |       | 124   |       | 154     | 159     |         | 0,00                            | Reinfection             |
| 01-124_DOF                                  | 149     | 159     |         |         | 181   |       | 78     |        | 152     |         |         | 238   |       |       | 152   |       | 165     |         |         |                                 |                         |
| 01-168_D0                                   | 162     | 172     |         |         | 178   |       | 82     |        | 150     |         |         | 232   |       |       | 145   |       | 161     |         |         | 0,00                            | Reinfection             |
| 01-168_DOF                                  | 150     | 159     |         |         | 163   | 190   | 82     |        | 154     |         |         | 261   |       |       | 142   |       | 176     | 186     |         |                                 |                         |
| 01-175_D0                                   | 149     | 160     |         |         | 186   |       | 82     |        | 154     |         |         | 240   |       |       | 150   |       | 165     |         |         | 0,00                            | Reinfection             |
| 01-175_DOF                                  | 151     | 163     | 175     |         | 159   | 169   | 79     | 82     | 152     | 171     |         | 226   | 237   |       | 113   |       | 161     | 169     |         |                                 |                         |
| 01-191_D0                                   | 185     |         |         |         | 165   |       | 82     |        | 157     |         |         | 140   | 236   |       | 122   |       | 166     |         |         | 0,02                            | Reinfection             |
| 01-191_DOF                                  | 150     | 159     | 162     |         | 169   |       | 81     |        | 151     | 157     |         | 249   |       |       | 159   |       | 165     | 175     |         |                                 |                         |
| 01-197_D0                                   | 150     | 159     | 175     |         | 164   | 172   | 82     | 85     | 154     | 151     |         | 230   |       |       | 123   |       | 168     |         |         | 0,00                            | Reinfection             |
| 01-197_DOF                                  | 156     | 167     |         |         | 175   |       | 82     |        | 142     |         |         | 217   |       |       | 143   |       | 159     |         |         |                                 |                         |
| 02-012_D0                                   | 164     | 176     |         |         | 169   |       | 82     |        | 148     |         |         | 228   | 239   |       | 135   |       | 174     |         |         | 0,00                            | Reinfection             |
| 02-012_DOF                                  | 196     |         |         |         | 74    |       | x      |        | x       |         |         | 140   |       |       | x     |       | x       |         |         |                                 |                         |
| 02-014_D0                                   | 161     | 173     |         |         | 173   |       | 83     | 88     | 134     |         |         | 239   | 255   |       | 142   |       | 165     |         |         | 0,00                            | Reinfection             |
| 02-014_DOF                                  | 136     | 147     |         |         | 142   |       | 72     |        | 160     |         |         | 140   | 243   |       | 146   |       | 165     |         |         |                                 |                         |
| 02-019_D0                                   | 161     | 164     |         |         | 168   | 183   | 82     |        | 174     |         |         | 240   | 262   |       | 123   |       | 159     | 162     |         | 0,00                            | Reinfection             |
| 02-019_DOF                                  | 173     | 178     |         |         | 174   |       | 79     |        | 152     |         |         | 264   |       |       | 139   |       | 176     |         |         |                                 |                         |
| 02-036_D0                                   | 175     | 184     |         |         | 171   | 186   | 82     | 79     | 149     | 158     |         | 234   | 240   |       | 130   | 147   | 168     |         |         | 0,00                            | Reinfection             |
| 02-036_DOF                                  | 161     | 173     |         |         | 175   |       | 81     | 78     | 161     |         |         | 253   |       |       | 147   |       | 161     |         |         |                                 |                         |
| 02-055_D0                                   | 148     | 160     |         |         | 130   |       | 82     |        | 151     |         |         | 253   |       |       | 139   |       | 176     |         |         | 0,93                            | Recrudescence           |
| 02-055_DOF                                  | 149     | 161     |         |         | 130   |       | 82     |        | 152     |         |         | 140   | 253   |       | 139   |       | 177     |         |         |                                 |                         |
| 02-065_D0                                   | 158     | 169     |         |         | 159   |       | 81     |        | 151     |         |         | 234   |       |       | 138   |       | 161     |         |         | 0,04                            | Reinfection             |
| 02-065_DOF                                  | 160     | 168     | 173     |         | 172   | 175   | 82     | 78     | 145     | 149     |         | 230   |       |       | 140   |       | 161     | 173     | 180     |                                 |                         |
| 02-074_D0                                   | 177     | 187     |         |         | 169   |       | 72     |        | 161     |         |         | 73    | 140   | 238   | 123   |       | 162     |         |         | 0,06                            | Reinfection             |
| 02-074_DOF                                  | 162     | 192     | 184     |         | 168   |       | 82     |        | 148     | 161     |         | 247   |       |       | 139   |       | 168     |         |         |                                 |                         |
| 02-088_D0                                   | 150     | 160     |         |         | 178   |       | 78     |        | 137     |         |         | 247   |       |       | 148   |       | 183     |         |         | 0,02                            | Reinfection             |
| 02-088_DOF                                  | 161     | 164     |         |         | 74    | 172   | x      |        | 149     | 165     |         | 221   | 230   | 245   | x     |       | 165     |         |         |                                 |                         |
| 02-133_D0                                   | 164     | 175     | 178     |         | 163   | 175   | 82     | 88     | 158     | 168     | 177     | 226   |       |       | 123   | 128   | 165     | 186     |         | 0,69                            | Recrudescence           |
| 02-133_DOF                                  | 64      | 175     | 178     | 179     | 159   |       | 79     | 82     | 158     |         |         | 226   |       |       | 151   |       | 161     | 180     |         |                                 |                         |
